# Supplementary material for: Synthetic cellular communication-based screening for strains with improved 3-hydroxypropionic acid secretion
Source: Royal Society of Chemistry journal article supplement (doi:10.1039/d1lc00676b), 2021-01-01
Supplement: d1lc00676b1.pdf [file d1lc00676b1.pdf]

## Electronic Supporting Information

### **Synthetic Cellular Communication-Based Screening for Strains with Improved 3-Hydroxypropionic Acid Secretion**

Seungjin Kim<sup>1,†</sup>, Si Hyung Jin<sup>2,†</sup>, Hyun Gyu Lim<sup>1,†</sup>, Byungjin Lee<sup>2</sup>, Jaesung Kim<sup>2</sup>, Jina Yang<sup>3</sup>, Sang Woo Seo<sup>3</sup>, Chang-Soo Lee<sup>2,\*</sup>, Gyoo Yeol Jung<sup>1,4,\*</sup>

<sup>1</sup>Department of Chemical Engineering and <sup>4</sup>School of Interdisciplinary Bioscience and Bioengineering, Pohang University of Science and Technology, 77 Cheongam-Ro, Nam-Gu, Pohang, Gyeongbuk 37673, Korea.

<sup>2</sup>Department of Chemical Engineering and Applied Chemistry, Chungnam National University, 99 Daehak-ro, Yuseong-gu, Daejeon 34134, Korea.

<sup>3</sup>School of Chemical and Biological Engineering, Institute of Chemical Process, Seoul National University, 1 Gwanak-Ro, Gwanak-Gu, Seoul 08826, Korea.

\*To whom correspondence should be addressed.

†These authors contributed equally to this work.

(Chang-Soo Lee)

Mailing address: Department of Chemical Engineering, Chungnam National University, 99 Daehak-ro, Yuseong-gu, Daejeon 34134, Korea.

Tel.: +82-42-821-5896, Fax: +82-42-822-8995, E-mail: rhadum@cnu.ac.kr

(Gyoo Yeol Jung)

Mailing address: Department of Chemical Engineering, Pohang University of Science and Technology, 77 Cheongam-Ro, Nam-Gu, Pohang, Gyeongbuk 37673, Korea.

Tel.: +82-54-279-2391, Fax: +82-54-279-5528, E-mail: gyjung@postech.ac.kr

## **Supplementary Methods**

### **Method S1. Development of a genetic sensor for the sensitive detection of 3-hydroxypropionic acid (3-HP)**

A fresh colony of *E. coli* W strain harboring the pCDF-116C4sgfp plasmid<sup>1</sup> (WSEN3, Table S1) on an LB agar plate was inoculated in 3 mL of the LB medium. Following overnight cultivation, the cell culture was refreshed by diluting into 3 mL of fresh medium at 0.05 OD<sub>600</sub> (optical density at 600 nm). When the OD<sub>600</sub> reached 1, the culture was further diluted into 20 mL of the medium at 0.05 OD<sub>600</sub>. Specifically for this main culture, 0.1 g/L 3-HP was included. After 6 h of incubation, the top 0.01% of most high-fluorescence cells out of the total library of approximately 10<sup>7</sup> cells were sorted using Bio-Rad Laboratories FACS. The cells obtained were inoculated into 3 mL of the medium and cultured overnight. The culture was used as a seed culture for another round of sorting. A total of three rounds of sorting were conducted. Finally, sorted cells were spread on an LB agar plate and their plasmids were sequenced and characterized. The screened cells had an identical mutation (-69delA from the coding sequence of *sgfp*) on the promoter region of the 3-HP sensor plasmid.

## **Method S2. Fabrication of the microfluidic chips**

Droplet generation and droplet sorting chips were fabricated from polydimethylsiloxane (PDMS) chips using standard soft lithography<sup>2</sup> and multilayer soft lithography<sup>3</sup>, respectively. A single layer of photoresist (SU8 3025, Microchem, Westborough, MA, USA) was spin-coated onto a silicon wafer for constructing molds for the droplet generation chip (20  $\mu\text{m}$  height) or valve layer (50  $\mu\text{m}$  height) of the droplet sorting chip. Then, the coated photoresists on the wafers were photo-polymerized through the channel-patterned masks. The mold for the fluidic layer of the droplet sorting chip was fabricated from double layers (10  $\mu\text{m}$  and 20  $\mu\text{m}$  height) of photoresists (SU8 3005, 3025, Microchem). The PDMS mixture, at a 10:1 ratio of elastomer and curing agent, was poured onto the valve layer mold and incubated in a 65°C oven for 1 h. A partially cured PDMS slab was peeled off from the mold and a hole was punched at the end of the valve. The PDMS mixture at a 20:1 ratio was spin-coated onto the fluidic layer mold with 40  $\mu\text{m}$  height and partially cured for 40 min. The PDMS slab of the valve was aligned on the fluidic layer and placed in an oven at 65°C for overnight incubation. For the droplet generation chip, PDMS mixture at a 10:1 ratio was poured onto the corresponding mold and incubated at 65°C overnight. Fully cured PDMS slabs were peeled off from each mold and holes were introduced to create inlets and outlets. Then, the slabs were bonded with PDMS spin-coated glass slides as the bottom substrate using plasma treatment. The assembled chips were incubated overnight in a 65°C oven to restore the hydrophobic nature of the PDMS surface.

### **Method S3. Screening confirmation by specific amplification of an SC1-specific genetic region**

To monitor the enrichment, two different plasmids, pMD20 and pMD20-2, were introduced into the SC2 and SC1 strains, respectively. Specifically, the pMD20-2 plasmid contained an additional 1 kb non-coding sequence compared to the pMD20 plasmid. When a set of the universal primers (AmpR\_F and AmpR\_B, Table S2) was used, a common region that existed in both plasmids was amplified. The extra\_PCR\_F and extra\_PCR\_B primers are specifically bound to the additional sequence of pMD20-2 in SC1. Therefore, this region could be amplified only when SC1 cells were present (Figure 1D). Separately generated co-culture droplets (SC1-RC2 and SC2-RC2) were incubated at 37°C for 9 h. To validate the chip-based device sorting capability of the co-culture system, droplets were mixed at a 9:1 ratio of SC1-RC2 to SC2-RC2 droplets. Mixed droplets were aliquoted and labeled ‘Before’. The mixed droplets were re-injected into the sorting device and only the top 1% of most fluorescent droplets were harvested and labeled ‘After’. Both samples were placed in test tubes filled with 3 mL modified glycerol M9 medium and grown for 9 h at 37°C. Single colonies of SC1 and SC2 were inoculated into 3 mL of the medium, grown for 9 h at 37°C, and labeled ‘SC1’ and ‘SC2’. All samples were denatured by incubating at 98°C for 20 min using a thermal cycler. The PCR was performed with 0.2  $\mu$ M of each primer, 1  $\mu$ L of a sample, 2X Takara EmeraldAmp GT PCR Master Mix (Kusatsu, Japan), and water (a reaction volume of 10  $\mu$ L). Amplification was performed with a program: 2 min at 98°C followed by 30 cycles of 10 sec at 98°C, 30 sec at 56°C, and 40 sec at 72°C followed by a 5 min as a final extension step.

#### **Method S4. Genomic DNA library preparation**

Extracted *E. coli* W genomic DNA was fragmented via sonication (300 watts, 2 s x 2 rounds) using a Sonics<sup>R</sup> Vibra cell<sup>TM</sup> VCX-750 (Newtown, CT, USA). Fragmented DNA of 3-5 kb was obtained by DNA gel purification using a GeneAll<sup>R</sup> Expin<sup>TM</sup> Gel SV kit (GeneAll Biotechnology). Then, both ends of the fragments were repaired and 5'-phosphorylated using a NEBNext<sup>R</sup> End Repair Module kit (NEB). The resulting blunt-ended and phosphorylated fragments were further ligated with the vector fragment amplified from pMD20 (pMB1-derived origin, high copy) using pMD20\_F and pMD20\_B. The ligated products were transformed into ElectroMAX<sup>TM</sup> DH10B cells (NEB) for the high efficiency of transformation. Subsequently, plasmids were extracted and reintroduced into the SC3 strain harboring the 3-HP-producing plasmid.

## Method S5. Plasmid cloning

The pACYC\_3HP plasmid was constructed by subcloning a gene expression cassette of *kgsadh* from the pUC\_K plasmid into the pACYC\_B4 plasmid containing gene expression cassettes of *dhaB1*, *dhaB2*, *dhaB3*, and *gdrAB*. The gene expression cassette was amplified using the KGSADH\_F and KGSADH\_B primers. Both the pACYC\_B4 plasmid and the amplified fragment were digested using the Bsu36I enzyme and ligated with each other.

To construct the pCDF\_ *tetA* plasmid, the *tetA* gene was amplified from the pBR322 plasmid using the tetA\_F and tetA\_B primers. Then, the pCDF plasmid and the amplified fragment were digested using the KpnI and SacI enzymes and ligated with each other. To construct the pMD20\_extra plasmid, a vector fragment was amplified from the pMD20 plasmid using the pMD20\_F and pMD20\_B primers. An insert fragment harboring an extra 1 kb sequence was amplified from the pET\_mCherry plasmid using 5'-phosphorylated extra\_F and extra\_B primers. The two amplified fragments were blunt-end ligated. To construct the pMD20\_ *gltP*, pMD20\_ *yjcO*, pMD20\_ *sgrST*, pMD20\_ *sgrST-setA*, and pMD20\_ *leuD* plasmids, a vector fragment was amplified from the pMD20 plasmid using the pMD20\_SacI and pMD20\_NcoI primers. Gene fragments were amplified using the *E. coli* W genomic DNA as a template and the *gltP*\_F, *gltP*\_B, *yjcO*\_F, *yjcO*\_B, *sgrST*\_F, *sgrST*\_B, *setA*\_B, *leuD*\_F, and *leuD*\_B primers. The vector fragment and gene fragments were digested using the SacI and NcoI enzymes and ligated to yield their respective plasmids. To construct the pUC\_K2 plasmid, the pUC\_K plasmid lacking the ampicillin resistance gene, the pUC\_K plasmid was amplified using 5'-phosphorylated pUCK2\_F and pUCK2\_B primers. Subsequently, the resulting fragment was blunt-end ligated. To construct the pUC\_kan plasmid, the pUC\_K2 plasmid was amplified using 5'-phosphorylated pUCKan\_F and pMD20\_B\* primers. Subsequently, the resulting fragment was blunt-end ligated. To construct the pMD20\_mCherry-FKF plasmid, fragments were amplified from pET-mCherry and pMD20-FKF(f72) using 5'-phosphorylated

mCherry\_F and mCherry\_B, and FRT\_F and FRT\_B. Two fragments were blunt-end ligated. Homology site1-mCherry-FRT-kan<sup>R</sup>-FRT-Homology site2 was amplified from pMD20\_mCherry-FKF using mCFKF\_H1\_F and mCFKF\_H2\_B to insert mCherry gene into the genome.

## Supplementary Figures

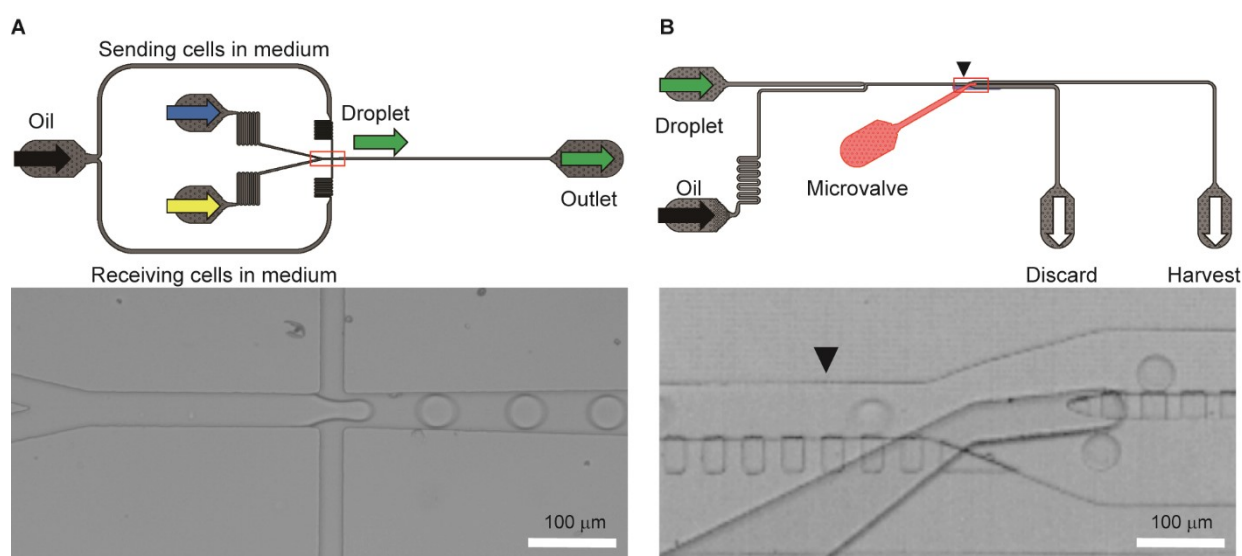

**Figure S1. Schematics of the developed microfluidic platform.** (A) Schematic image of coculture droplet generation chip. The flow directions of oil, sending cells, receiving cells, and droplets are represented by black, blue, yellow, and green arrows, respectively. The inset figure is the microscope image of the flow-focusing junction (red box in A) in which the droplet is generated. (B) Schematic images of sorting chip. The flow of oil and droplets are indicated by black and green arrows, respectively. The inset figure shows the sorting junction. The region irradiated with the laser is indicated by a black triangle. All scale bars indicate 100  $\mu\text{m}$ .

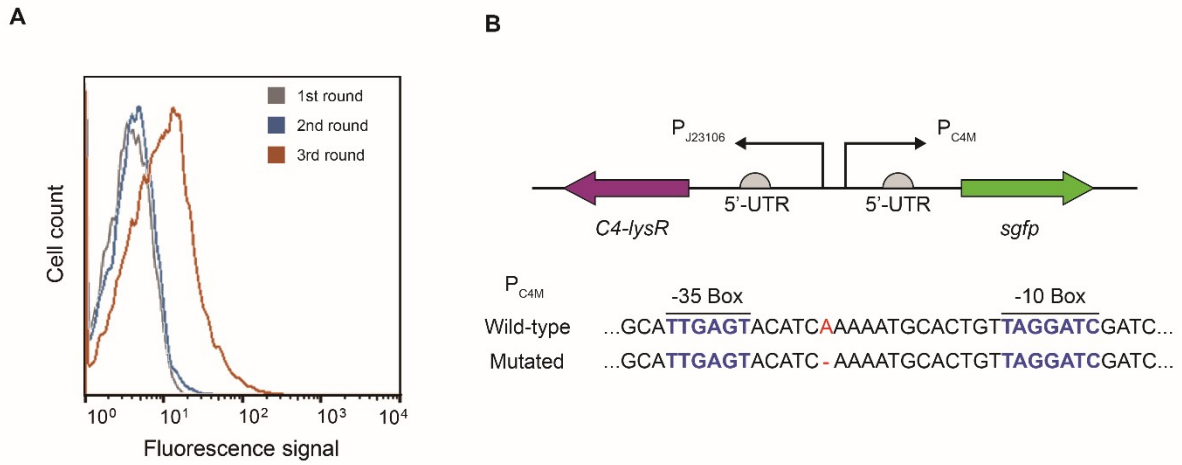

**Figure S2. Screening of a mutant sensor for the sensitive detection of 3-HP.** (A) To obtain a mutated sensor with higher sensitivity, the WSEN3 strain (Supplementary Table 1) was cultivated in the M9 minimal medium with 0.1 g/L 3-HP for 6 h, and the top 0.01% fraction showing high fluorescence was enriched using a conventional fluorescence-activated cell sorter (FACS). The *x*-axis indicates fluorescence intensities in an arbitrary unit and the *y*-axis indicates cell numbers. (B) The mutated sensor has a single A deletion in the promoter region of *sgfp*. The -35 and -10 boxes were predicted using the PromoterHunter tool from phiSITE (<http://www.phisite.org>)<sup>4</sup>

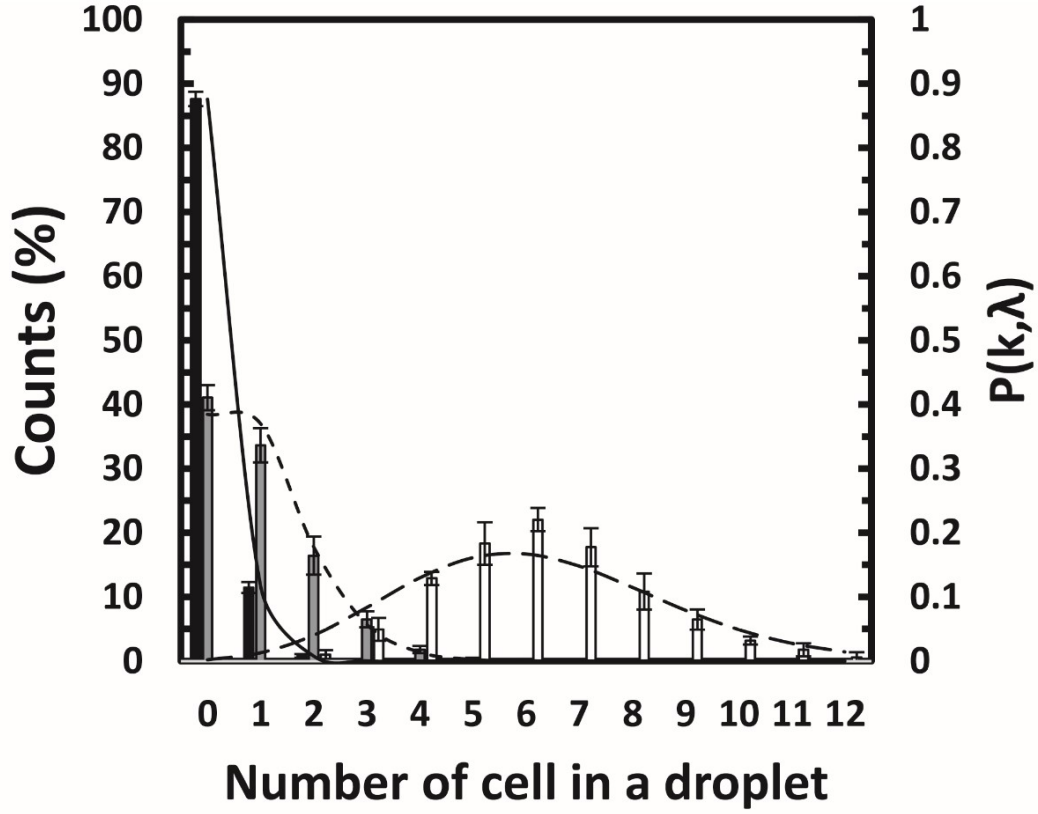

**Figure S3. Distribution of encapsulated cell numbers depending on the injected cell concentrations.** Bar graphs show the fraction of each encapsulated cell number and lines indicate the Poisson distribution. The number of cells in each microdroplet is counted to estimate the ratio of single-cell encapsulating microdroplets ( $P_{(k,\lambda)} = \lambda^k \exp(-\lambda)/k!$  where  $P_{(k,\lambda)}$  is the probability of a droplet containing  $k$  number of cells, with  $\lambda$  being the mean number of cells per droplet). The RC2 strain (Supplementary Table 1) cultivated with 0.1 g/L 3-HP for *gfp* expression was injected into one of the inlets while the medium without cells was injected into the other inlet. The throughput for generating droplets was 3000 Hz. The numbers of fluorescent cells in droplets were counted using a microscope. Although there appears to be an inconsistency between  $OD_{600}$  and Lambda values because OD loses linearity at high cell densities, we confirmed that high reproducibility in three independent replicates with actual cell counts under the microscope.

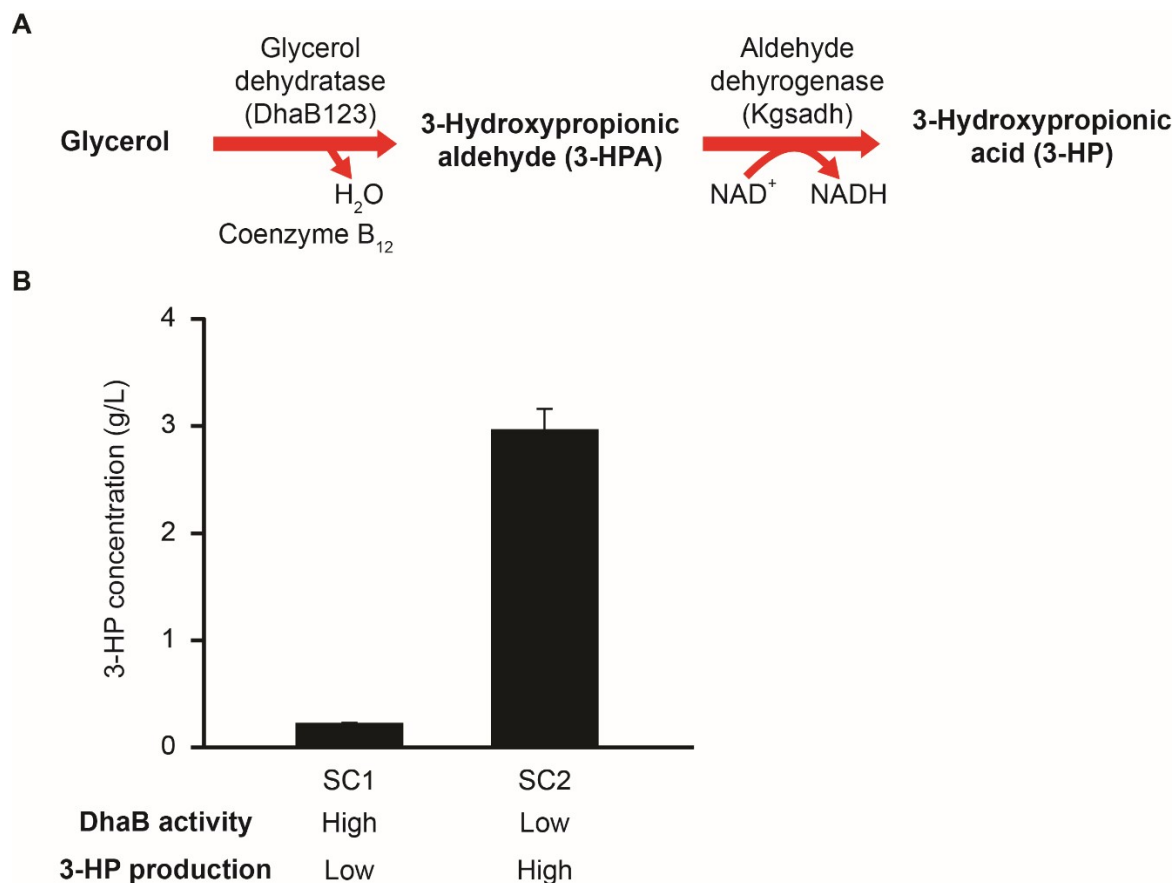

**Figure S4. A schematic diagram of the 3-HP production pathway from glycerol.** (A) A schematic diagram of the 3-HP biosynthetic pathway. Glycerol is converted into 3-hydroxypropionic aldehyde (3-HPA) by glycerol dehydratase consisting of three subunits (DhaB1, DhaB2, and DhaB3) from *Klebsiella pneumoniae*. 3-HPA is further oxidized into 3-HP by aldehyde dehydrogenase (Kgsadh) from *Azospirillum brasilense*. (B) 3-HP production of the SC1 and SC2 strains after being cultured for 24 h with 100 mM glycerol. The two strains have different activities of glycerol dehydratase. Error bars indicate the actual two data points of the biological duplicates ( $n = 2$ ).

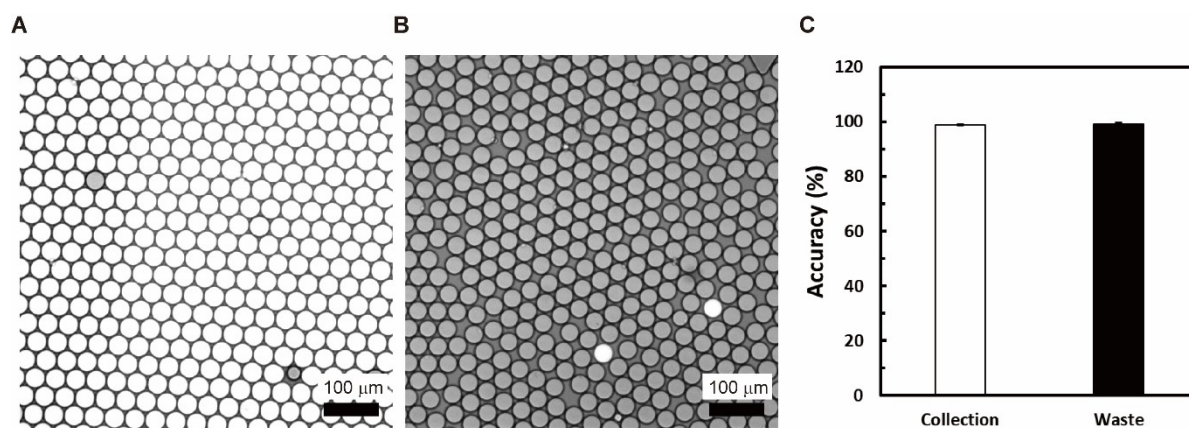

**Figure S5. Validation of sorting accuracy.** (A-B) Images of droplets from (A) collection and (B) waste tubes after sorting on a chip. To validate the sorting accuracy, two different droplets (bright and dark) containing 1 mM and 0.5 mM fluorescein sodium salt, respectively, were used. The dark droplets additionally contained 25% v/v green dye to distinguish the two droplets when monitored by a microscope. For testing, the two different droplets were mixed at a ratio of 1:1, and the resulting mixture was injected into the sorting chip. The sorting accuracy in the collection and waste outlets was  $98.94 \pm 0.18$  and  $99.08 \pm 0.37$ , respectively (triplicates,  $n > 800$  droplets).

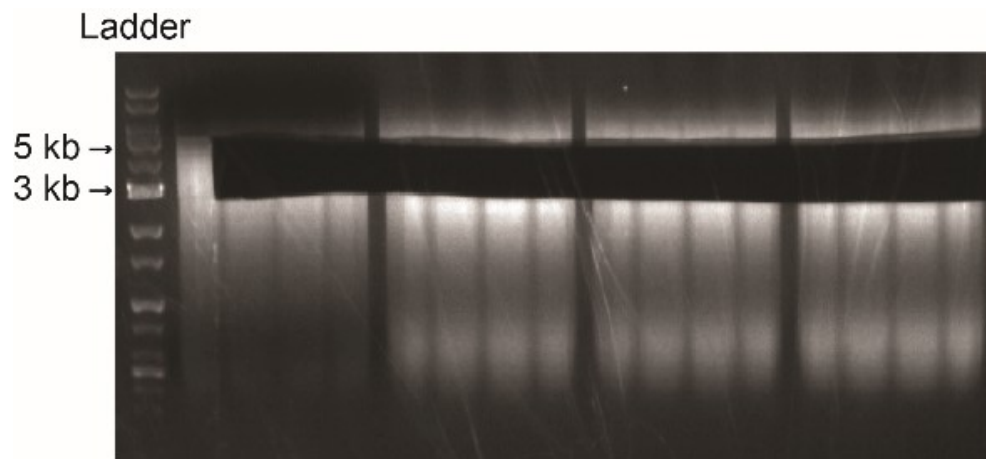

**Figure S6. Genomic DNA fragments for constructing the library.** To generate a library, *E. coli* genomic DNA was extracted and fragmented via sonication. To improve the cloning efficiency, the exposure to UV light was avoided by selectively exposing a ladder and a partial sample lane. After obtaining the desired gel fragment containing 3-5 kb DNA, the rest of the gel was monitored under UV for confirmation. A total of  $10^7$  library cells were obtained.

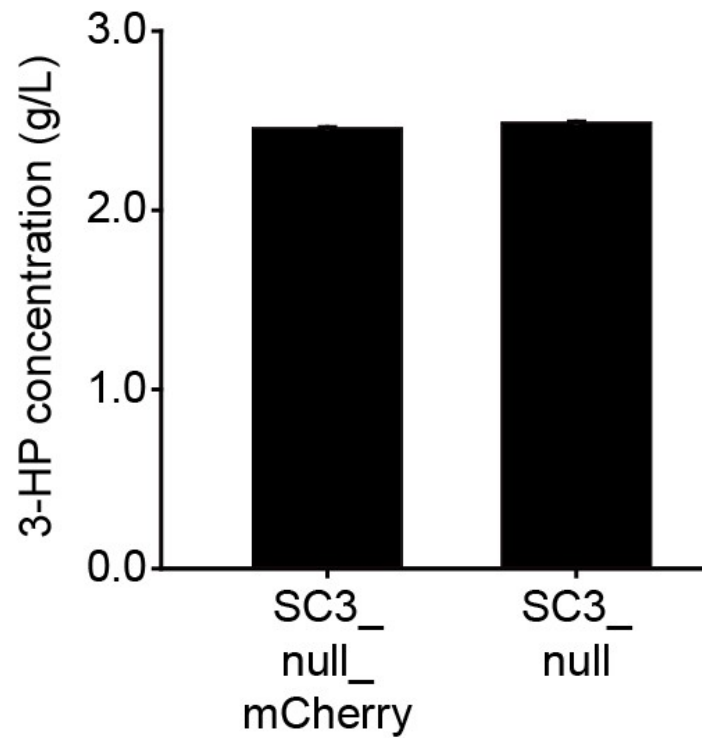

**Figure S7. Comparison of 3-HP production by SC3\_null\_mCherry and SC3\_null.** SC3\_null\_mCherry was generated by integrating a gene expression cassette for the constitutive expression of *mCherry* in the intergenic region of *yjiP* and *yjiR* of the SC3\_null strain genome. The expression of *mCherry* did not affect the 3-HP production (SC3\_null\_mCherry: 2.46 g/L, SC3\_null: 2.49 g/L). Error bars indicate standard deviation ( $n = 3$ ).

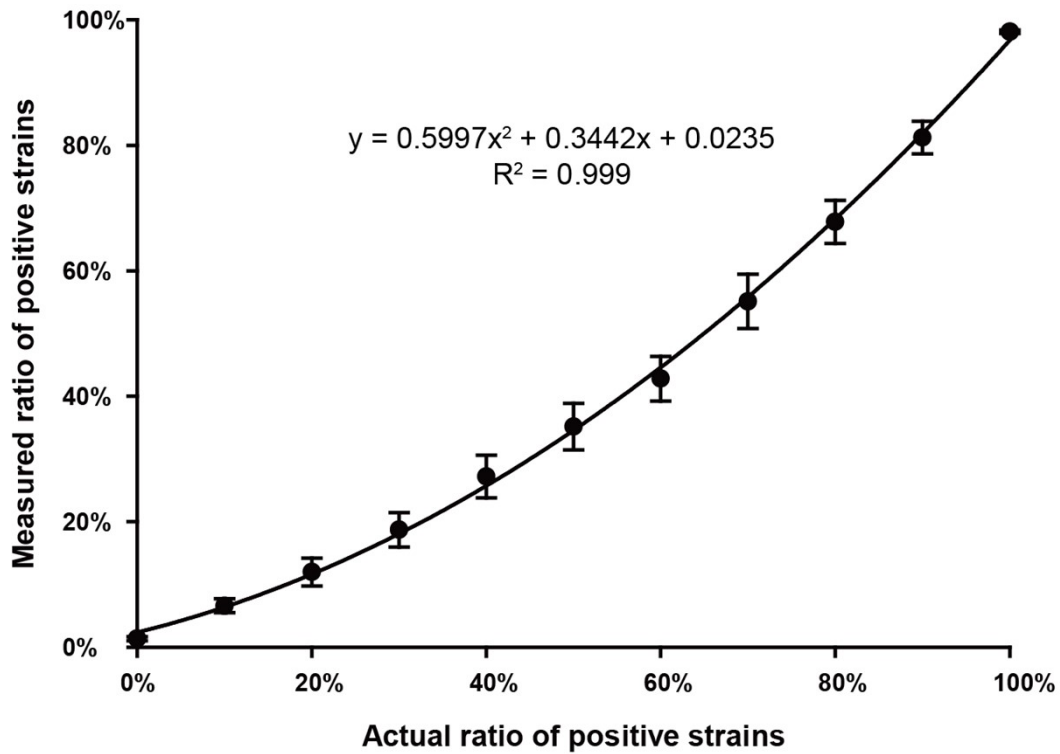

**Figure S8. Standard curve to determine the fractions of each strain in a mixture.** The SC3\_null\_mCherry and the two positive strains (SC3\_fragment1 and SC3\_fragment2) were individually grown and they were mixed at various ratios (0-100%). At least 100,000 cells in a mixture were analyzed by using a Cytotflex. The fluorescence threshold was determined at which signals of the strains were most well distinguished. The obtained data was fitted to a quadratic equation. Error bars indicate the actual two data points ( $n = 2$ ).

**A : Fragment1\_Unsorted**

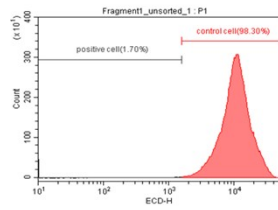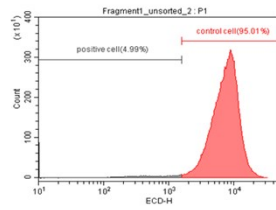

**C : Fragment1\_sorted**

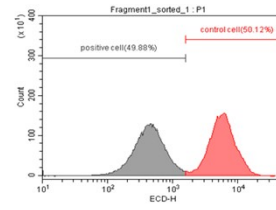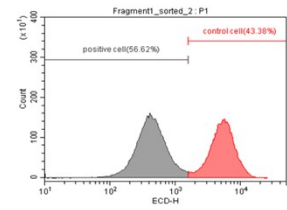

**B : Fragment2\_Unsorted**

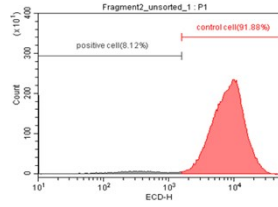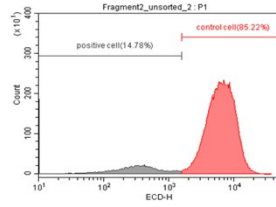

**D : Fragment2\_Sorted**

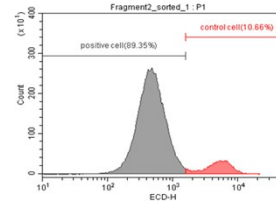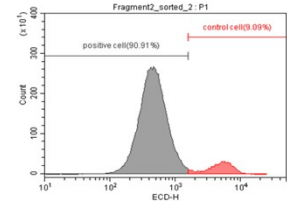

**Figure S9. Flow cytometry assay of unsorted and sorted cell mixtures.** (A-D) Fluorescence distribution of (A and B) unsorted mixtures and (C and D) sorted mixtures. (A and C) The initial mixture contains the SC3\_null\_mCherry and SC3\_fragment1 strains at a 9:1 ratio (B and D). The initial mixture contains the SC3\_null\_mCherry and SC3\_fragment2 strains at a 9:1 ratio. The unsorted and sorted mixtures were incubated for 12 h and the fluorescence of cells was analyzed by using a Cytoflex. This analysis was performed in technical duplicates. *x*- and *y*-axis indicate fluorescence intensity and cell numbers, respectively.

## Supplementary Tables

**Table S1. Strains and plasmids used in this study.**

| Name                     | Description                                                                               | Antibiotic resistance | Source                                      |
|--------------------------|-------------------------------------------------------------------------------------------|-----------------------|---------------------------------------------|
| <b>Strains</b>           |                                                                                           |                       |                                             |
| <i>E. coli</i> W         | An acid tolerant and fast-growing <i>E. coli</i> strain, ATCC 9637                        | None                  | The American Type Culture Collection (ATCC) |
| <i>E. coli</i> Mach1-T1R | A cloning host                                                                            | None                  | Invitrogen                                  |
| WSEN3                    | <i>E. coli</i> W / pCDF-116C4sgfp                                                         | Sm                    | <sup>1</sup>                                |
| SC1                      | <i>E. coli</i> W / pCDF_tetA / pMD20-2 / pACYC_B1 / pUC_K2 /                              | Cm, Amp, Kan, Sm, Tet | This study                                  |
| SC2                      | <i>E. coli</i> W / pCDF_tetA / pMD20 / pACYC_B4 / pUC_K2                                  | Cm, Amp, Kan, Sm, Tet | This study                                  |
| SC3                      | <i>E. coli</i> W / pACYC_3HP / pCDF_tetA                                                  | Cm, Sm, Tet           | This study                                  |
| SC3_null                 | SC3 / pMD20                                                                               | Cm, Sm, Tet, Amp      | This study                                  |
| SC3_null_mCherry         | <i>E. coli</i> W_J23100-mCherry-FRT-kan <sup>R</sup> -FRT / pACYC_3HP / pCDF_tetA / pMD20 | Cm, Sm, Tet, Amp, Kan | This study                                  |
| SC3_fragment1            | SC3 / pMD20_fragment1                                                                     | Cm, Sm, Tet, Amp      | This study                                  |
| SC3_fragment2            | SC3 / pMD20_fragment2                                                                     | Cm, Sm, Tet, Amp      | This study                                  |
| SC3_gltP                 | SC3 / pMD20_gltP                                                                          | Cm, Sm, Tet, Amp      | This study                                  |
| SC3_yjcO                 | SC3 / pMD20_yjcO                                                                          | Cm, Sm, Tet, Amp      | This study                                  |
| SC3_sgrST                | SC3 / pMD20_sgrST                                                                         | Cm, Sm, Tet, Amp      | This study                                  |
| SC3_sgrST-setA           | SC3 / pMD20_sgrST-setA                                                                    | Cm, Sm, Tet, Amp      | This study                                  |
| SC3_leuD                 | SC3 / pMD20_leuD                                                                          | Cm, Sm, Tet, Amp      | This study                                  |
| RC1                      | <i>E. coli</i> W / pMD20 / pACYC / pUC_kan / pCDF-116C4sgfp                               | Cm, Sm, Amp, Kan      | This study                                  |
| RC2                      | <i>E. coli</i> W / pMD20 / pACYC / pUC_kan / pCDF_116C4sgfp(-69delA)                      | Cm, Sm, Amp, Kan      | This study                                  |
| RC3                      | <i>E. coli</i> W / pMD20 / pACYC / pCDF_116C4sgfp(-69delA)                                | Cm, Sm, Amp           | This study                                  |
| RC4_null                 | <i>E. coli</i> W / pCDF-116C4sgfp / pMD20                                                 | Sm, Amp               | This study                                  |

|                        |                                                              |         |            |
|------------------------|--------------------------------------------------------------|---------|------------|
| RC4_ <i>leuD</i>       | <i>E. coli</i> W / pCDF-116C4sgfp / pMD20_ <i>leuD</i>       | Sm, Amp | This study |
| RC4_ <i>sgrST</i>      | <i>E. coli</i> W / pCDF-116C4sgfp / pMD20_ <i>sgrST</i>      | Sm, Amp | This study |
| RC4_ <i>sgrST-setA</i> | <i>E. coli</i> W / pCDF-116C4sgfp / pMD20_ <i>sgrST-setA</i> | Sm, Amp | This study |
| RC4_ <i>yjcO</i>       | <i>E. coli</i> W / pCDF-116C4sgfp / pMD20_ <i>yjcO</i>       | Sm, Amp | This study |

### Plasmids

|                          |                                                                                                                                                                                                                                      |          |            |
|--------------------------|--------------------------------------------------------------------------------------------------------------------------------------------------------------------------------------------------------------------------------------|----------|------------|
| pCDF                     | CloDF13 ori                                                                                                                                                                                                                          | Sm       | Novagen    |
| pMD20                    | pMB1-derived ori                                                                                                                                                                                                                     | Amp      | Takara     |
| pMD20-2                  | pMB1-derived ori, containing extra marker sequence                                                                                                                                                                                   | Amp      | This study |
| pACYC                    | p15A ori                                                                                                                                                                                                                             | Cm       | Novagen    |
| pBR322                   | pMB1 ori                                                                                                                                                                                                                             | Amp, Tet | Takara     |
| pCDF-116C4sgfp           | pCDF-P <sub>J23116</sub> -synUTR <sub>C4lysR</sub> -C4lysR-T-P <sub>C4M</sub> -synUTRsgfp-sgfp                                                                                                                                       | Sm       | 1          |
| pACYC_B1                 | p15A ori, P <sub>tac</sub> -SynUTR <sub>1dhaB1</sub> - <i>dhaB1</i> -P <sub>tac</sub> -SynUTR <sub>dhaB2</sub> - <i>dhaB2</i> - <i>dhaB3</i> - <i>gdrA</i> - <i>gdrB</i>                                                             | Cm       | 5          |
| pACYC_B4                 | p15A ori, P <sub>tac</sub> -SynUTR <sub>4dhaB1</sub> - <i>dhaB1</i> -P <sub>tac</sub> -SynUTR <sub>dhaB2</sub> - <i>dhaB2</i> - <i>dhaB3</i> - <i>gdrA</i> - <i>gdrB</i>                                                             | Cm       | 5          |
| pUC_K                    | pMB1-derived ori, P <sub>tac</sub> -SynUTR <sub>kgsadh</sub> - <i>kgsadh</i>                                                                                                                                                         | Amp, Kan | 5          |
| pUC_K2                   | pUC_K lacking the AmpR gene                                                                                                                                                                                                          | Kan      | This study |
| pCDF_116C4sgfp(-69delA)  | A mutated pCDF-116C4sgfp plasmid                                                                                                                                                                                                     | Sm       | This study |
| pACYC_3HP                | p15A ori, P <sub>tac</sub> -SynUTR <sub>4dhaB1</sub> - <i>dhaB1</i> -P <sub>tac</sub> -SynUTR <sub>dhaB2</sub> - <i>dhaB2</i> - <i>dhaB3</i> - <i>gdrA</i> - <i>gdrB</i> -P <sub>tac</sub> -SynUTR <sub>kgsadh</sub> - <i>kgsadh</i> | Cm       | This study |
| pCDF_ <i>tetA</i>        | pCDF containing the <i>tetA</i> gene                                                                                                                                                                                                 | Sm, Tet  | This study |
| pMD20_fragment1          | pMD20 containing the <i>sgrR-sgrS-setA-leuD-leuC</i> region of <i>E. coli</i> W                                                                                                                                                      | Amp      | This study |
| pMD20_fragment2          | pMD20 containing the <i>gltP-yjcO-fdhF</i> region of <i>E. coli</i> W                                                                                                                                                                | Amp      | This study |
| pMD20_ <i>gltP</i>       | pMD20 containing the <i>gltP</i> gene of <i>E. coli</i> W                                                                                                                                                                            | Amp      | This study |
| pMD20_ <i>yjcO</i>       | pMD20 containing the <i>yjcO</i> gene of <i>E. coli</i> W                                                                                                                                                                            | Amp      | This study |
| pMD20_ <i>sgrST</i>      | pMD20 containing the <i>sgrS</i> and <i>sgrT</i> genes of <i>E. coli</i> W                                                                                                                                                           | Amp      | This study |
| pMD20_ <i>sgrST-setA</i> | pMD20 containing the <i>sgrS</i> , <i>sgrT</i> , and <i>setA</i> genes of <i>E. coli</i> W                                                                                                                                           | Amp      | This study |
| pMD20_ <i>leuD</i>       | pMD20 containing the <i>leuD</i> genes of <i>E. coli</i> W                                                                                                                                                                           | Amp      | This study |
| pUC_kan                  | pMB1-derived ori, kanR gene                                                                                                                                                                                                          | Kan      | This study |
| pET-mCherry              | A source of the extra marker sequence                                                                                                                                                                                                | Amp      | 6          |

|                   |                                                                                                |         |            |
|-------------------|------------------------------------------------------------------------------------------------|---------|------------|
|                   | used in the pMD20-2 plasmid and a source of the mCherry sequence used in the pMD20_mCherry-FKF |         |            |
| pKD46             | Red recombinase expression vector                                                              | Amp     | 7          |
| pCP20             | FLP expression vector                                                                          | Amp, Cm | 7          |
| pMD20-FKF(f72)    | A source of the FRT-kan <sup>R</sup> -FRT sequence                                             | Amp     | 8          |
| pMD20_mCherry-FKF | pMD20-FKF(f72) containing mCherry-FRT-kan <sup>R</sup> -FRT                                    | Amp     | This study |

<sup>a</sup>Abbreviations: Amp, ampicillin; Cm, chloramphenicol; Sm, streptomycin; Km, kanamycin;

Tet, tetracycline.

**Table S2. Oligonucleotide sequences used in this study.**

| Name                      | Sequence (5'–3') <sup>a</sup>                                                  |
|---------------------------|--------------------------------------------------------------------------------|
| AmpR_F                    | CCGCATACACTATTCTCAGAATGACTTGG                                                  |
| AmpR_B                    | ACTCCCCGTCGTGTAGATAACTACG                                                      |
| extra_PCR_F               | GGTCACAGCTTGTCTGTAAGC                                                          |
| extra_PCR_B               | ATGAACTCGCCATCCTGC                                                             |
| KGSADH_F                  | ACACCACCTCAGGGAGTTAGCTCACTCGAGCTCTTGAC                                         |
| KGSADH_B                  | GATCGCCCTGAGGAAAAAAGGGCGATCTTGCGACCGCCCTTTT<br>TTTCAGACGGCCATCACCGTC           |
| tetA_F                    | GAGCTCCACGAGGCCCTTTTCGTCTTCA                                                   |
| tetA_B                    | ACACCAGGTACCCGCATTCACAGTTCTCCGCAAG                                             |
| pMD20_F                   | CGTCGTGACTGGGAAAACCC                                                           |
| pMD20_B                   | GGTTTGCGTATTGGGCGCTCTTCC                                                       |
| pMD20_B*                  | *GGTTTGCGTATTGGGCGCTCTTCC<br>*GCTGGCTTA ACTATGCGGCTTGACAATTAATCATCGGCTGTAT     |
| extra_F                   | AATGTGTGGAGAAATTCAGTGGAAGGAGGAAGAAATGGTTTCC<br>AAGGGCGAGG                      |
| extra_B                   | *GAGCTCTTATTTGTACAGCTCATCCATGCCA                                               |
| pMD20_SacI                | ATCTGATGATGAGCTCCGTCGTGACTGGGAAAACCC                                           |
| pMD20_NcoI                | TACATTACTGCCATGGGGTTTGCGTATTGGGCGCTCTTCC                                       |
| gltP_F                    | AGTCCAGTACCCATGGCACCAATCAGTATTATTGCAG                                          |
| gltP_B                    | AGGTACCATTGAGCTCGGTTTGATACCGGGTGTG                                             |
| yjcO_F                    | AGTCCAGTACCCATGGCATTTTGCCGTCAACGTCGTGG                                         |
| yjcO_B                    | AGGTACCATTGAGCTCGGTTTCGACGCTGTATCAAAGTATTGCC                                   |
| sgrST_F                   | CAATGCAGTCCCATGGGTTGTTGCAGACGAGCAGATG                                          |
| sgrST_B                   | TACCATGTCAGAGCTCCATTGCCGATAGCCATCAAACAG                                        |
| setA_B                    | AGTTACGTAGGAGCTCCACGACGACGCCATTGC                                              |
| leuD_F                    | GTACATCAGTCCATGGCGAAGTGGCTATCGACAAAGTG                                         |
| leuD_B                    | AATGGCATGTGAGCTCGCTACCACCTTATTTACTAACAGTATTT<br>CTAC                           |
| pUCK2_F                   | *CAGGACCACTTCTGCGCTC                                                           |
| pUCK2_B                   | *CCCGAAAAGTGCCACCTG                                                            |
| pUCKan_F                  | *TGGACAGCAAGCGAACCG                                                            |
| tet promoter              | TCCCTATCAGTGATAGAGATTGACATCCCTATCAGTGATAGAG<br>ATACTGAGCAC                     |
| Terminator<br>(BBa_B1002) | CGCAAAAAACCCCGCTTCGGCGGGGTTTTTTCGC                                             |
| mCherry_F                 | ACTGTACATGGATTTGACGGCTAGCTCAGTCCTAGGTACAGTG<br>CTAGCGTGTGGAGAAATTCAGTGGAAGGAGG |
| mCherry_B                 | AATCTCATGACCAAAATCCCTTAACGTGAG                                                 |
| FRT_F                     | GCATGACCGGCGCGATGC                                                             |
| FRT_B                     | GCTCAGCGGATCTCATGCGC                                                           |
| mCFKF_H1_F                | TCTATTGAATTTGCGCGGTTTGTAGGCCGGATAAGGCGTTCAC<br>GCCGCATAACTGTTGGGAAGGGCGATCG    |
| mCFKF_H2_B                | ATCGCCACGTTCCAGCATGGCTTAGGCAAAGTGTGCTTCGTTC<br>ATACCGGCTCAGCGGATCTCATGCGC      |

<sup>a</sup>Underlined sequences are restriction enzyme recognition sites.

<sup>b</sup>\* indicates 5' phosphorylation.

## **Supplementary Video**

### **Video S1. The workflow of the synthetic cellular communication-based screening.**

Sending and receiving cell suspensions are mixed and encapsulated to generate a co-culture droplet. Co-culture droplets are sorted based on the fluorescence of receiving cells according to the secretion phenotype of a sending cell.

## Supplementary references

1. J. Y. Seok, J. Yang, S. J. Choi, H. G. Lim, U. J. Choi, K.-J. Kim, S. Park, T. H. Yoo, and G. Y. Jung, *Metab. Eng.*, 2018, **47**, 113–120.
2. D. C. Duffy, J. C. McDonald, O. J. Schueller, and G. M. Whitesides, *Anal. Chem.*, 1998, **70**, 4974–4984.
3. M. A. Unger, H. P. Chou, T. Thorsen, A. Scherer, and S. R. Quake, *Science*, 2000, **288**, 113–116.
4. L. Klucar, M. Stano, and M. Hajduk, *Nucleic Acids Res.*, 2010, **38**, D366–70.
5. H. G. Lim, M. H. Noh, J. H. Jeong, S. Park, and G. Y. Jung, *ACS Synth. Biol.*, 2016, **5**, 1247–1255.
6. C. W. Kang, H. G. Lim, J. Yang, M. H. Noh, S. W. Seo, and G. Y. Jung, *Metab. Eng.*, 2018, **48**, 121–128.
7. K. A. Datsenko and B. L. Wanner, *Proc. Natl. Acad. Sci. USA*, 2000, **97**, 6640–6645.
8. J. Yang, S. W. Seo, S. Jang, S.-I. Shin, C. H. Lim, T.-Y. Roh, and G. Y. Jung, *Nat. Commun.*, 2013, **4**, 1413
